# Supplementary material for: A preliminary study of ALPPS procedure in a rat model
Source: PubMed Central journal article supplement (PMC4668375; doi:10.1038/srep17567), 2015-12-03

**SREP-15-17599B**

**A preliminary study of the ALPPS procedure in a rat model**

Huawen Shi\*<sup>1</sup>, Guangchao Yang\*<sup>1</sup>, Tongsen Zheng<sup>†1</sup>, Jiabei Wang<sup>1</sup>, Lulu Li<sup>2</sup>, Yingjian Liang<sup>1</sup>, Changming Xie<sup>1</sup>, Dalong Yin<sup>1</sup>, Boshi Sun<sup>1</sup>, Jing Sun<sup>1</sup>, Huanlai Wang<sup>1,3</sup>, Shangha Pan<sup>1</sup>, Hongchi Jiang<sup>1</sup>, WanYee Lau<sup>†4</sup>, Lianxin Liu<sup>†1</sup>

**Disclosures:** The paper is not based on a previous communication to a society or meeting (with full details) and the authors declare no conflicts of interest.

## Supplemental Data

### Supplementary Tables

**Table S1 Changes in protein levels of genes related to liver regeneration in rats.**

Changes in protein levels of genes related to liver regeneration in rats.

| Gene           | Day 2 after Step I |             |               |           |            | Day 2 after Step II |             |               |           |            |
|----------------|--------------------|-------------|---------------|-----------|------------|---------------------|-------------|---------------|-----------|------------|
|                | Sham               | Transection | LLL Resection | PVL       | ALPPS      | Sham                | Transection | LLL Resection | PVL       | ALPPS      |
| IL-6           | 1.00±0.21          | 3.45±0.45   | 2.45±0.67     | 4.62±0.34 | 18.2±0.15* | 1.00±0.11           | 2.41±0.18   | 2.48±0.78     | 3.89±0.41 | 15.4±0.57* |
| TGF- $\alpha$  | 1.00±0.23          | 1.56±0.34   | 1.72±0.41     | 2.13±0.23 | 3.28±0.45  | 1.00±0.15           | 2.13±0.34   | 2.67±0.23     | 3.12±0.22 | 4.11±0.34  |
| NF- $\kappa$ B | 1.00±0.15          | 4.34±0.56   | 2.67±0.43     | 5.31±0.45 | 9.42±0.23* | 1.00±0.21           | 3.45±0.41   | 2.16±0.32     | 4.67±0.37 | 14.4±0.37* |
| STAT3          | 1.00±0.09          | 3.12±0.67   | 2.19±0.32     | 3.78±0.36 | 12.4±0.17* | 1.00±0.05           | 3.41±0.23   | 2.56±0.12     | 3.56±0.31 | 9.45±0.77* |
| TNF- $\alpha$  | 1.00±0.27          | 3.78±0.23   | 4.12±0.67     | 3.78±0.28 | 8.45±0.28* | 1.00±0.17           | 2.67±0.43   | 3.56±0.43     | 3.15±0.21 | 6.34±0.31  |
| SCF            | 1.00±0.13          | 2.12±0.15   | 1.67±0.35     | 1.79±0.48 | 2.56±0.25  | 1.00±0.14           | 1.76±0.22   | 1.78±0.34     | 1.67±0.34 | 3.78±0.21  |
| EGF            | 1.00±0.16          | 5.12±0.34   | 2.13±0.45     | 3.14±0.31 | 10.4±0.21* | 1.00±0.32           | 3.78±0.34   | 3.12±0.23     | 4.14±0.23 | 12.3±0.66* |
| HGF            | 1.00±0.06          | 2.34±0.35   | 3.17±0.28     | 4.23±0.42 | 11.2±0.32* | 1.00±0.25           | 3.12±0.21   | 4.13±0.25     | 4.19±0.45 | 13.1±0.31* |
| JAK            | 1.00±0.14          | 1.45±0.34   | 1.78±0.31     | 2.11±0.23 | 3.23±0.18  | 1.00±0.08           | 1.72±0.35   | 1.67±0.26     | 2.34±0.26 | 3.45±0.34  |
| SOCS-3         | 1.00±0.17          | 3.13±0.16   | 2.12±0.56     | 3.13±0.26 | 4.13±0.27  | 1.00±0.07           | 2.77±0.27   | 1.87±0.45     | 3.56±0.33 | 5.12±0.11  |
| ERK-1/2        | 1.00±0.12          | 2.67±0.45   | 3.12±0.31     | 4.23±0.19 | 9.43±0.81* | 1.00±0.14           | 3.28±0.33   | 3.56±0.12     | 4.67±0.41 | 8.54±0.36* |
| C-kit          | 1.00±0.04          | 1.87±0.32   | 1.89±0.51     | 2.21±0.31 | 3.67±0.56  | 1.00±0.11           | 2.13±0.28   | 2.01±0.32     | 2.34±0.38 | 4.15±0.46  |
| c-met          | 1.00±0.05          | 1.34±0.19   | 1.78±0.67     | 1.84±0.28 | 2.42±0.33  | 1.00±0.06           | 1.77±0.34   | 1.76±0.15     | 1.93±0.21 | 2.56±0.18  |
| Src            | 1.00±0.16          | 2.56±0.43   | 2.04±0.32     | 2.91±0.42 | 3.14±0.28  | 1.00±0.09           | 3.14±0.22   | 2.45±0.25     | 3.11±0.34 | 4.23±0.34  |
| Akt            | 1.00±0.18          | 1.69±0.28   | 1.72±0.41     | 2.13±0.38 | 2.89±0.46  | 1.00±0.08           | 1.56±0.32   | 1.89±0.37     | 2.44±0.44 | 2.11±0.15  |
| c-myc          | 1.00±0.04          | 2.14±0.67   | 2.29±0.67     | 1.78±0.89 | 2.56±0.51  | 1.00±0.12           | 1.55±0.38   | 2.13±0.34     | 1.89±0.23 | 2.54±0.34  |
| c-jun          | 1.00±0.16          | 1.34±0.41   | 1.67±0.51     | 2.45±0.31 | 3.13±0.34  | 1.00±0.16           | 2.11±0.33   | 1.87±0.26     | 2.56±0.25 | 3.56±0.21  |
| YAP            | 1.00±0.31          | 2.87±0.34   | 3.12±0.46     | 4.67±0.23 | 23.4±0.78* | 1.00±0.11           | 2.24±0.17   | 3.45±0.33     | 5.21±0.32 | 21.3±0.62* |

Notes: Values represent changes of protein expression in different groups. \*p<0.001vs PVL group.

**Table S2 Primer sequences for Real-time PCR assays of IL-6, TNF- $\alpha$ , HGF and GAPDH.**

| Gene          | Forward                  | Reverse                 |
|---------------|--------------------------|-------------------------|
| IL-6          | ACAGCGATGATGCACTGTCAG    | ATGGTCTTGGTCCTTAGCCAC   |
| TNF- $\alpha$ | AAATGGGCTCCCTCTCATCAGTTC | TCTGCTTGGTGGTTTGCTACGAC |
| HGF           | TCCTGTGCCAAAACAAAACA     | GGTGCTGACTGCATTCTCA     |
| GAPDH         | ACCACAGTCCATGCCATCAC     | TCCACCACCCTGTTGCTGTA    |

## **Shi et al; Supplementary Figure Legends**

**Figure S1** Changes in the right side of the middle liver lobe weight/body weight ratios after operations in the different groups. Mean  $\pm$  SD. ( $n = 4-6$  animals per group at each time point).

**Figure S2** Changes of the body weight of the animals during the period. Mean  $\pm$  SD. ( $n = 4-6$  animals per group at each time point).

**Figure S3 Cdk2-associated kinase activity after ALPPS.** (A) Liver protein extracts (400 pg/lane) from Sham or ALPPS rats were immunoprecipitated with anti-Cdk2 antibody, and the immune complexes were assayed for kinase activity with histone H1 as a substrate. (B) Densitometric analysis of phosphorylated histone H1 in A after subtracting nonspecific activity (expressed as percent of time-matched Sham controls).

**Figure S4 Comparison of representative liver regeneration-associated gene expressions in the regenerating liver tissues.** Gene expression detected by Real-time PCR at day 0, day 1, day 2 and day 5 was normalized by GAPDH. Data are means  $\pm$  SD of six animals in each group. \*\*\*  $P < 0.001$ , \*\*  $P < 0.01$  compared with the PVL, transection and LLL resection groups.

Figure S1

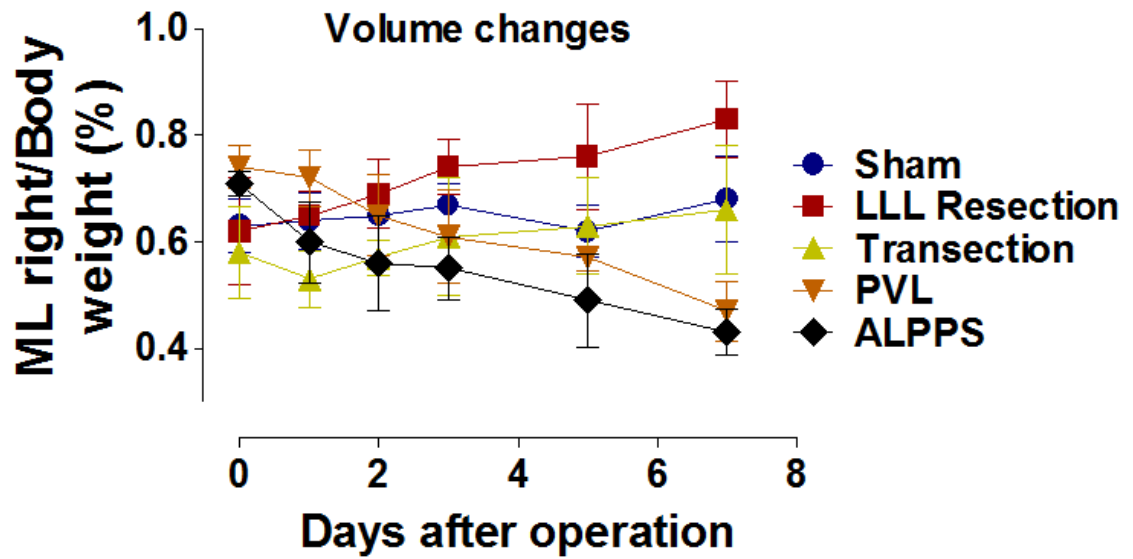

Figure S2

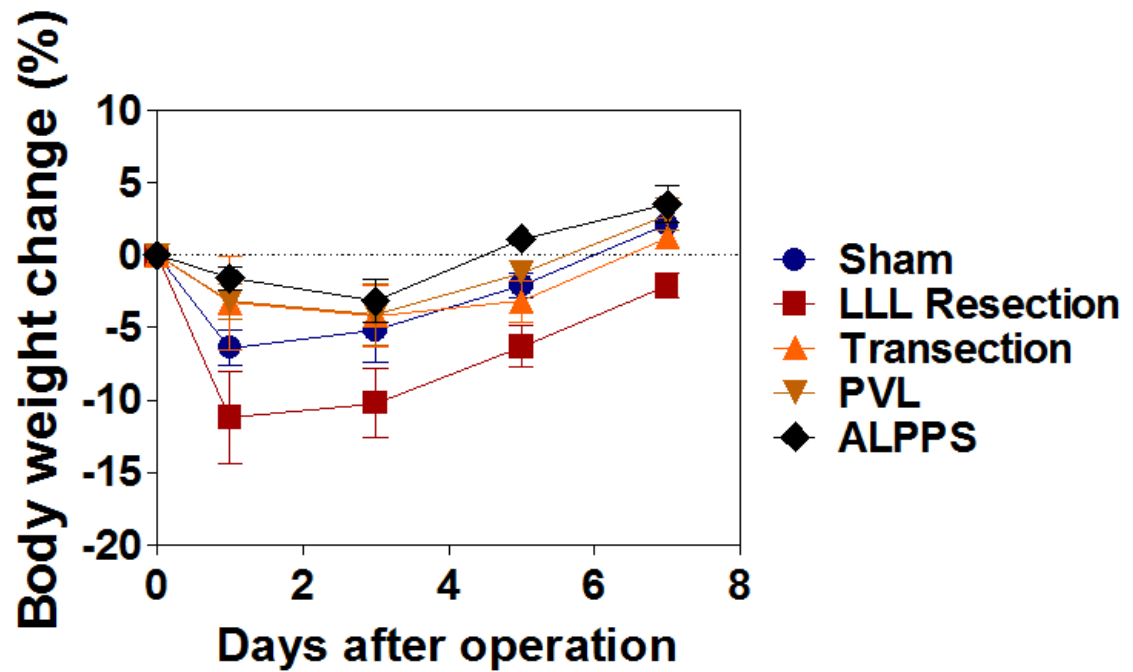

**Figure S3**

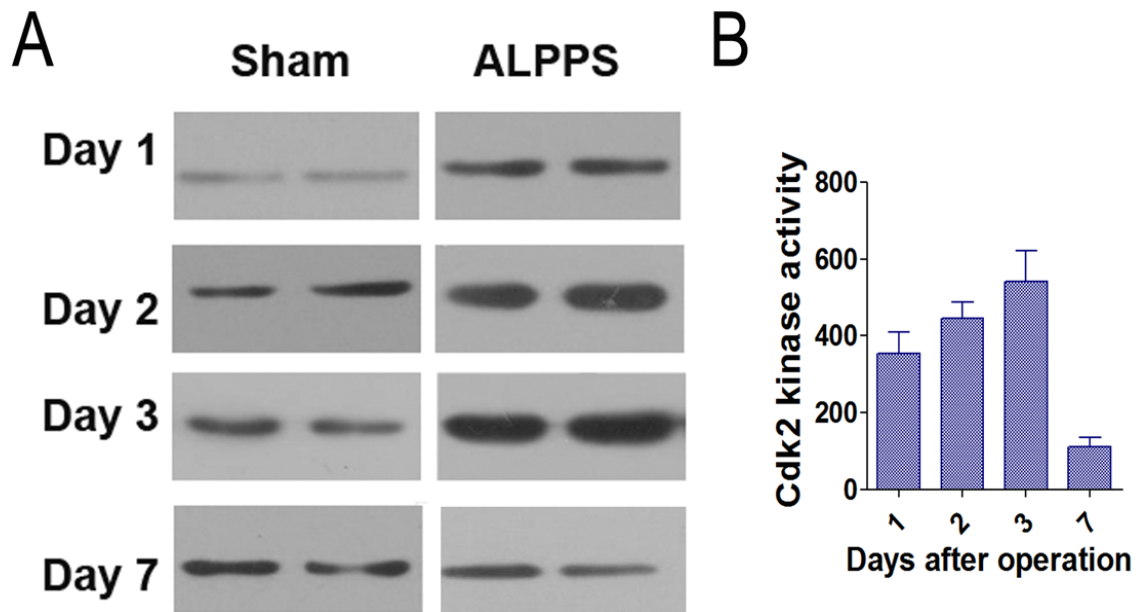

**Figure S4**

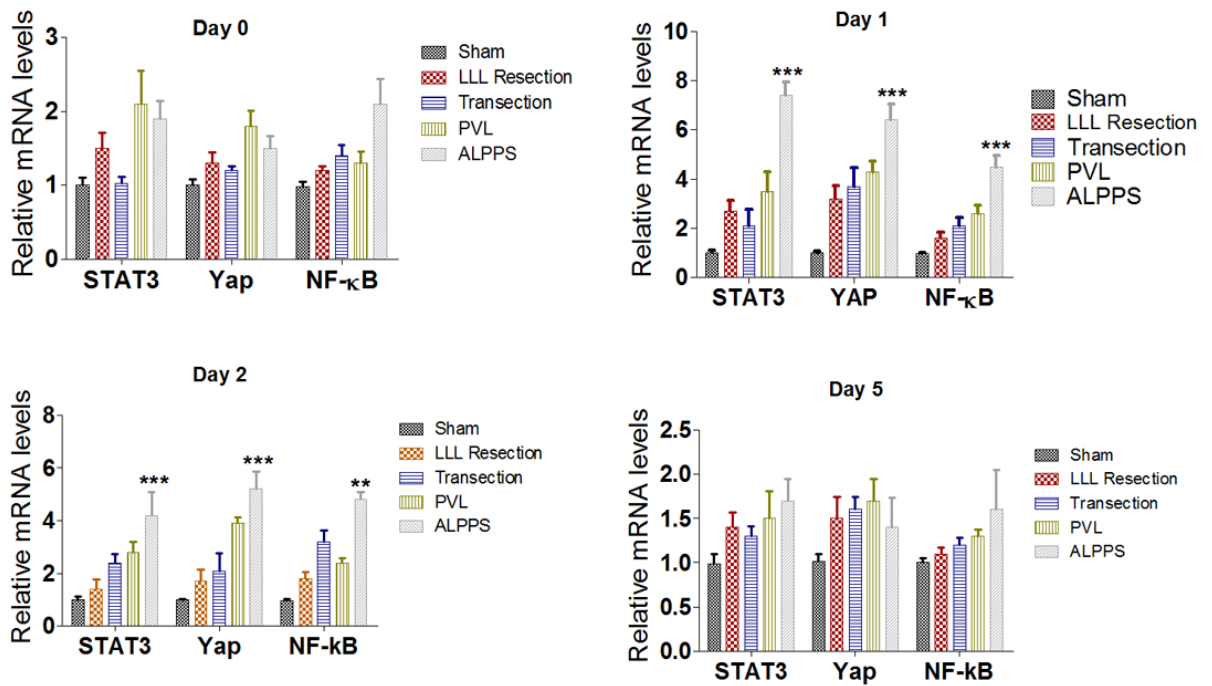

Supplement: srep17567-s1.pdf [file srep17567-s1.pdf]
